# Supplementary material for: Efficient algal lipid extraction via a green bio-electro-Fenton process and its conversion into biofuel and bioelectricity with concurrent wastewater treatment in a photosynthetic microbial fuel cell
Source: Royal Society of Chemistry journal article supplement (doi:10.1039/d3gc01548c), 2023-01-01
Supplement: d3gc01548c1.pdf [file d3gc01548c1.pdf]

# **Efficient algal lipid extraction via green bioelectro-Fenton process and its conversion into biofuel and bioelectricity with concurrent wastewater treatment in photosynthetic microbial fuel cell**

Swati Das<sup>1</sup>, Rishabh Raj<sup>2</sup>, Makarand M. Ghangrekar<sup>1, 2, 3\*</sup>

<sup>1</sup> PK Sinha Centre for Bioenergy & Renewables, Indian Institute of Technology Kharagpur,  
Kharagpur – 721302, India

<sup>2</sup> School of Environmental Science and Engineering, Indian Institute of Technology Kharagpur,  
Kharagpur – 721302, India

<sup>3</sup> Department of Civil Engineering, Indian Institute of Technology Kharagpur, Kharagpur –  
721302, India

\* Corresponding author Tel.: +91 3222 283440; E-mail: [ghangrekar@civil.iitkgp.ac.in](mailto:ghangrekar@civil.iitkgp.ac.in)

## **Supplementary file:**

**Table S1:** Configuration of all BEF-PMFCs fabricated during experimentation

| <b>PMFC designation</b> | <b>Catalyst coating</b>                       |
|-------------------------|-----------------------------------------------|
| BEF-PMFC-T1             | Cathode surface coated with Ni-Pd/C catalyst  |
| BEF-PMFC-T2             | Cathode surface coated with CoFe-AC catalyst  |
| BEF-PMFC-T3             | Cathode surface coated with AC-Fe catalyst    |
| PMFC-C                  | Bare carbon felt; Without having any catalyst |

**Table S2:** A comparative results of different advanced oxidation process-assisted algal cell disruption with yield

| Advanced oxidation                    | Optimal condition                                                                                                                     | Microalgal strain                     | Algal lipid recovery                                                                                                   | Reference             |
|---------------------------------------|---------------------------------------------------------------------------------------------------------------------------------------|---------------------------------------|------------------------------------------------------------------------------------------------------------------------|-----------------------|
| <b>Fenton</b>                         | FeSO <sub>4</sub> conc.: 0.025 mol/L; RT: 4 min; H <sub>2</sub> O <sub>2</sub> conc.: 0.29 mol/L                                      | <i>Chlorella vulgaris</i>             | Highest lipid yield of 17.4% w/w; 95 % of lipid extraction efficiency                                                  | <sup>1</sup>          |
| <b>Fenton</b>                         | 0.79% of H <sub>2</sub> O <sub>2</sub> ; pH 3.4; Molar ratio of H <sub>2</sub> O <sub>2</sub> to FeCl <sub>3</sub> =170:1; RT: 20 min | <i>C. vulgaris</i>                    | Maximum extraction efficiency for lipids was 77.4%                                                                     | <sup>2</sup>          |
| <b>Fenton and Lewis acid reaction</b> | FeCl <sub>3</sub> concentration: 2 mM; RT: 90 min; Reaction temperature: 87 °C                                                        | <i>Nannochloropsis salina</i>         | Maximum lipid extraction yield of 213 mg/g biomass; highest extraction yield of 19.3%                                  | <sup>3</sup>          |
| <b>Electro-Fenton</b>                 | H <sub>2</sub> O <sub>2</sub> concentration: 0.03 mol/L; RT: 40 min; Current density: 0.32 mA/cm <sup>2</sup>                         | <i>Chlorella homosphaera</i>          | Maximum lipid yield of 18.29%; highest lipid extraction efficiency of 90.66%                                           | <sup>4</sup>          |
| <b>Electro Fenton</b>                 | OH• generation: 1.27 mM; FeSO <sub>4</sub> conc.: 9.1 mM; Current density:16.4 mA/cm <sup>2</sup> ; RT: 37 min                        | <i>Nannochloropsis oceanica</i> IMET1 | Maximum lipid extraction yield of 155 mg; lipid extraction efficiency increased from 40% to 87.5%                      | <sup>5</sup>          |
| <b>Photocatalytic reaction</b>        | Photoanode: N-doped TiO <sub>2</sub> ; Cathode: palladium; Reaction time: 4 h; H <sub>2</sub> O <sub>2</sub> conc.: 3% v/v            | <i>C. vulgaris</i>                    | 96% of lipid-extraction efficiency; FAME yield of 55%                                                                  | <sup>6</sup>          |
| <b>Pulsed electric field</b>          | Electric field strength: 2.7 kV/cm; Electrode: stainless steel; Electrode distance: 15 mm                                             | <i>C. vulgaris</i>                    | Highest lipid extraction yield of 22% w/w of biomass                                                                   | <sup>7</sup>          |
| <b>Anodic oxidation</b>               | H <sub>2</sub> O <sub>2</sub> conc.: 8 ± 2 µM; Applied current: 500 mA<br>Reaction time: 2 h                                          | <i>Scenedesmus dimorphus</i>          | Highest extraction yield 23.4 g-lipid/g-of biomass                                                                     | <sup>8</sup>          |
| <b>Bio-electro Fenton</b>             | H <sub>2</sub> O <sub>2</sub> conc.: 125 mg/L, pH 3; RT: 6 h; BEF-Catalyst: Ni-Pd/C                                                   | Mixed algal consortium                | Highest 39.2 % w/w of lipid yield, 95% of lipid extraction efficiency; maximum power density of 74.5 mW/m <sup>2</sup> | Present investigation |

**Note:** FAME: fatty acid methyl ester; Conc.: concentration, RT: retention time; BEF: bioelectro-Fenton

**Table S3:** Performance efficiency of all three bioelectro-Fenton assisted PMFC setups

| <b>Parameter</b>                          | <b>BEF-PMFC-T1</b> | <b>BEF-PMFC-T2</b> | <b>BEF-PMFC-T3</b> | <b>PMFC-C</b> |
|-------------------------------------------|--------------------|--------------------|--------------------|---------------|
| <b>OCV (mV)</b>                           | 658.5 ± 52.3       | 620± 44.2          | 595± 41.5          | 550.8 ± 35.6  |
| <b>OV (mV)</b>                            | 162.8 ± 10.6       | 132 ± 10.1         | 122 ± 10.2         | 81.6 ± 9.6    |
| <b>COD removal (%)</b>                    | 89.2 ± 6.5         | 85.5 ± 6.8         | 81.2 ± 6.2         | 72.3 ± 6.1    |
| <b>CE (%)</b>                             | 24.7 ± 1.3         | 22.3 ± 1.2         | 20.5 ± 1.2         | 14.0 ± 1.0    |
| <b>Power density (mW/m<sup>2</sup>)</b>   | 74.5               | 56.8               | 48.6               | 25.8          |
| <b>Current density (mA/m<sup>2</sup>)</b> | 625.2              | 468.7              | 360.5              | 292.4         |
| <b>Internal resistance (Ω)</b>            | 66.5               | 78.3               | 90.4               | 140.0         |

**Note:** OCV: open circuit voltage; OV: operating voltage; COD: chemical oxygen demand; CE: coulombic efficiency; BEF: Bio-electro Fenton; PMFC: photosynthetic microbial fuel cell; BEF-PMFC-T1: cathode coated with Ni-Pd/C; BEF-PMFC-T2: cathode coated with CoFe-AC; BEF-PMFC- T3: cathode coated with AC-Fe; PMFC-C: control reactor

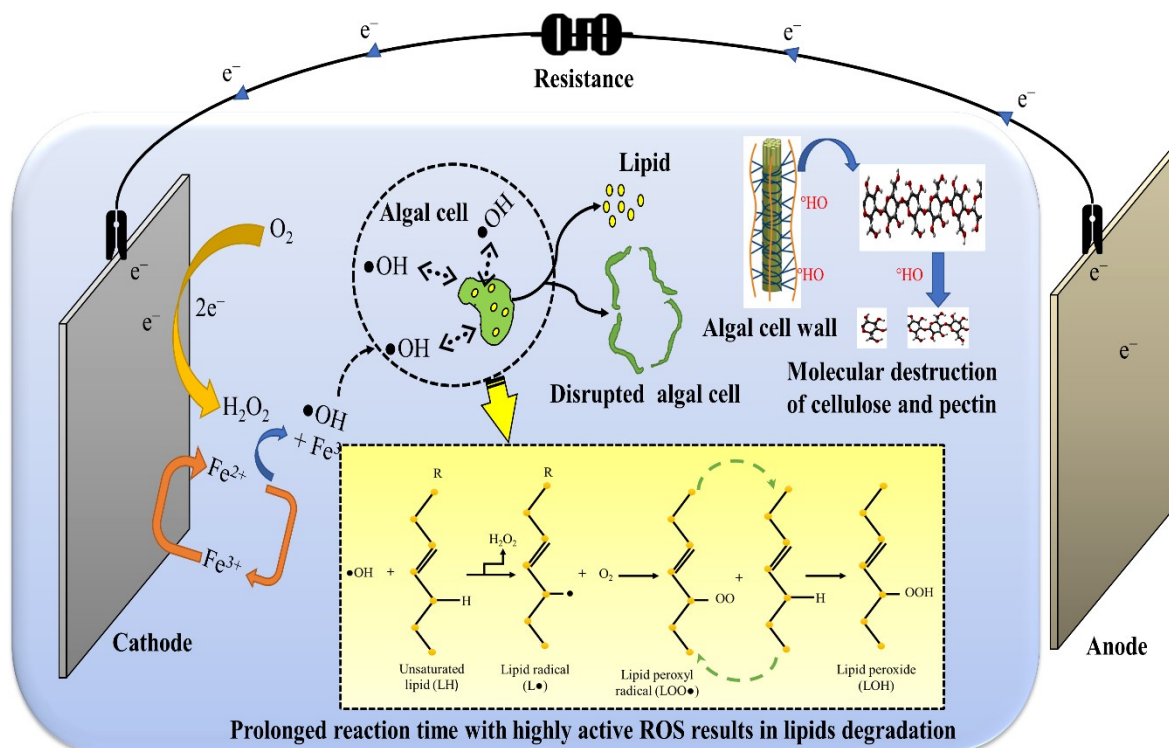

**Fig. S1:** Reaction in the cathodic chamber of BEF-PMFC along with algal cell disruption mechanism in the presence of highly reactive oxygen species

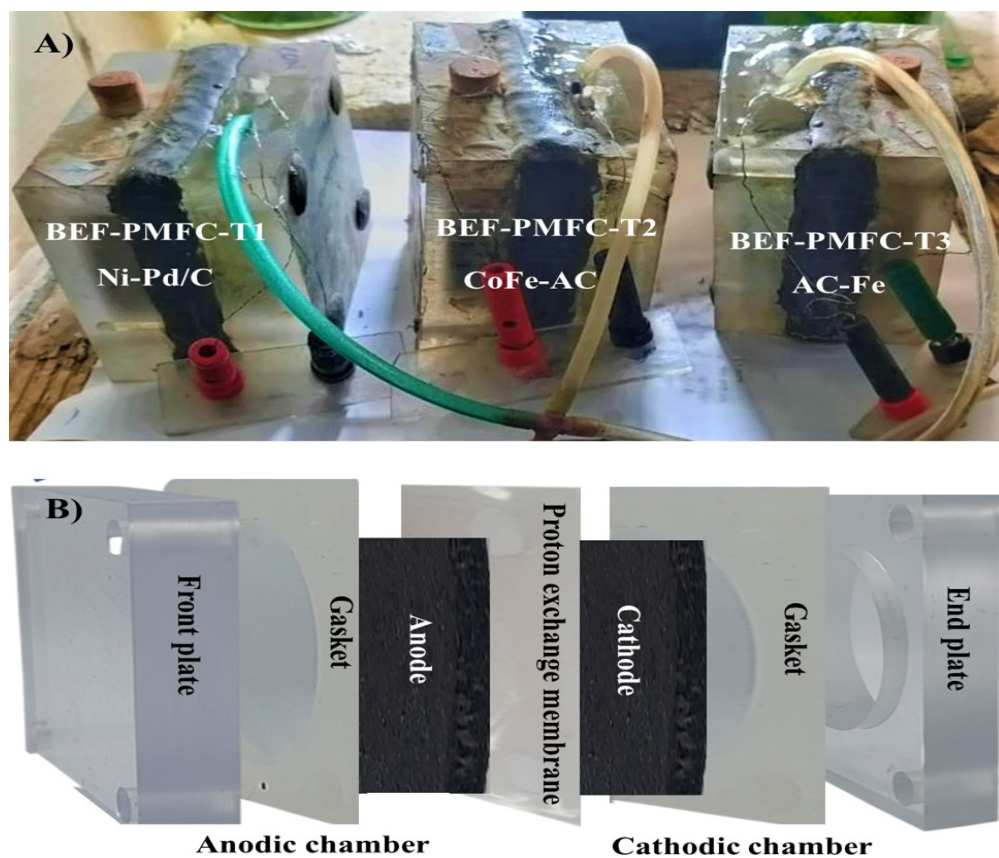

**Fig. S2:** (A) Three double chamber Fenton-assisted PMFC named as BEF-PMFC-T1 (cathode coated with Ni-Pd/C catalyst, BEF-PMFC-T2 (cathode coated with CoFe-AC catalyst) and BEF-PMFC-T3 (cathode coated with AC-Fe catalyst); (B) Schematic diagram of bioelectro-Fenton-assisted PMFC fabricated with acrylic sheet

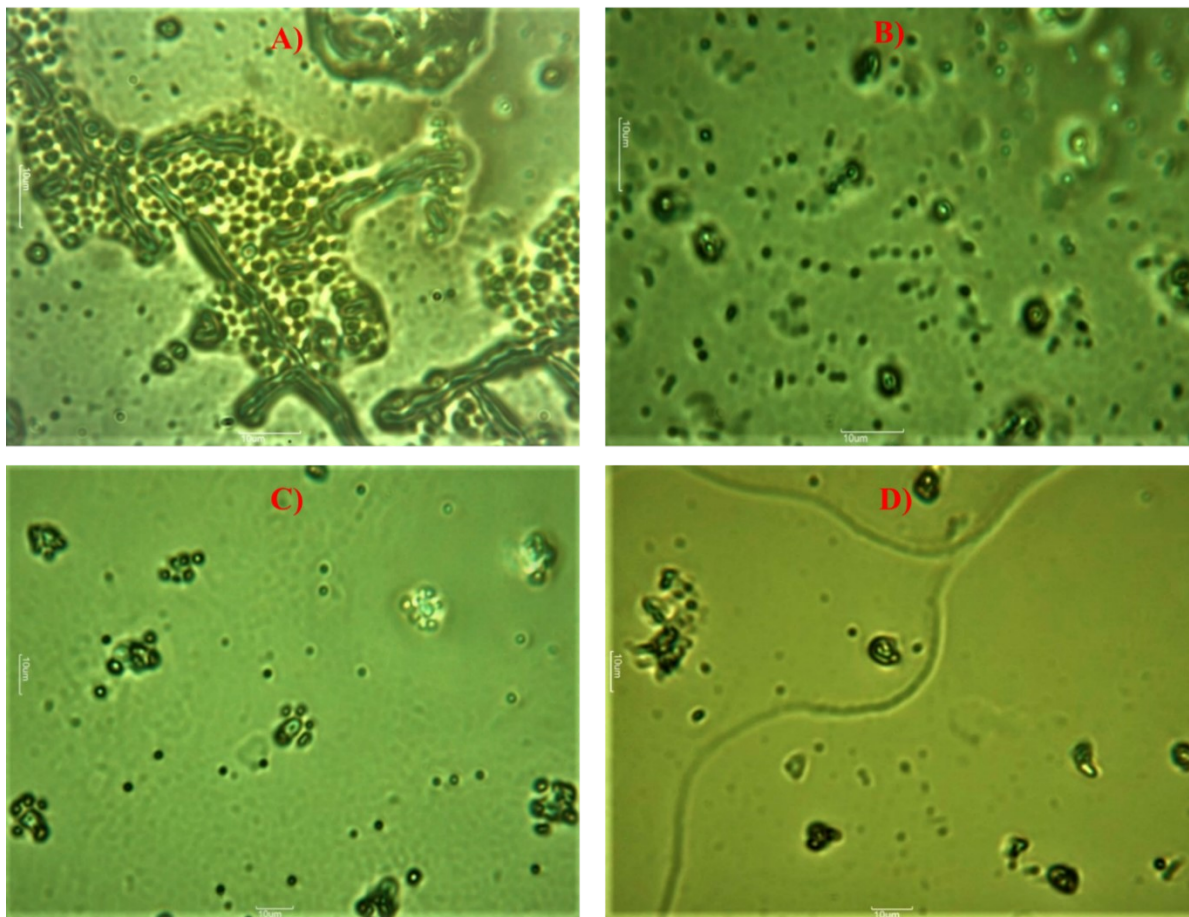

**Fig. S3:** Microscopic image of algal cell disruption under a magnification of 100X resolution:  
(A) Intact algal cell; (B) AC-Fe; (C) CoFe-AC; (D) Ni-Pd/C catalyst-assisted disrupted algal cell

## Reference

1. A. Steriti, R. Rossi, A. Concas and G. Cao, *Bioresour. Technol.*, 2014, **164**, 70-77.
2. I. Lee and J.-I. Han, *Renew. Energy*, 2021, **175**, 415-421.
3. D.-Y. Kim, J.-Y. Park, S.-A. Choi, Y.-K. Oh, I.-G. Lee, Y.-W. Seo and J.-I. Han, *Algal Res.*, 2014, **6**, 86-90.
4. W. P. Sandani, M. Premaratne, T. U. Ariyadasa and J. K. Premachandra, *Bioresour. Technol.*, 2022, **343**, 126110.
5. S. Zhang, Y. Hou, Z. Liu, X. Ji, D. Wu, W. Wang, D. Zhang, W. Wang, S. Chen and F. Chen, *Energies*, 2020, **13**, 3813.
6. Y. Wu, W. Xiang, L. Li, H. Liu, N. Zhong, H. Chang and B. E. Rittmann, *Chem. Eng. J.*, 2021, **420**, 130517.
7. C. Joannes, C. S. Sipaut, J. Dayou, S. M. Yasir and R. F. Mansa, *International Journal of Renewable Energy Research*, 2015, **5**, 598-621.
8. L. Hua, L. Guo, M. Thakkar, D. Wei, M. Agbakpe, L. Kuang, M. Magpile, B. P. Chaplin, Y. Tao and D. Shuai, *Bioresour. Technol.*, 2016, **203**, 112-117.
